# Supplementary material for: Photocatalytic degradation of an organophosphorus pesticide using a ZnO/rGO composite
Source: Royal Society of Chemistry journal article supplement (doi:10.1039/d0ra01741h), 2020-01-01
Supplement: d0ra01741h1.pdf [file d0ra01741h1.pdf]

**Table.S1. Structural and textural properties of ZnO and ZnO/rGO nanocomposite.**

| Catalysts | FWHM (°) | Grain size (nm) | a=b (Å) | c (Å)   | Unit cell volume (Å <sup>3</sup> ) |
|-----------|----------|-----------------|---------|---------|------------------------------------|
| ZG0       | 0.301    | 34.70           | 3.25016 | 5.20536 | 47.62                              |
| ZG1       | 0.319    | 31.92           | 3.24918 | 5.20752 | 47.61                              |
| ZG2       | 0.325    | 31.59           | 3.24946 | 5.20645 | 47.61                              |
| ZG3       | 0.31     | 31.58           | 3.25048 | 5.20732 | 47.65                              |
| ZG4       | 0.337    | 29.05           | 3.24987 | 5.20705 | 47.63                              |

**Table.S2 Characterization results for ZnO and ZnO/rGO nanocomposite**

| Catalysts | Surface area<br>(m <sup>2</sup> /g) | Pore volume<br>(10 <sup>-3</sup> cm <sup>3</sup> /g) | Pore size<br>(nm) | Partical size<br>(μm) |
|-----------|-------------------------------------|------------------------------------------------------|-------------------|-----------------------|
| ZG0       | 30.9                                | 4.12                                                 | 1.07              | 17.1                  |
| ZG1       | 39.3                                | 4.19                                                 | 1.28              | 14.0                  |
| ZG2       | 41.0                                | 4.72                                                 | 1.26              | 17.7                  |
| ZG3       | 25.4                                | 4.14                                                 | 1.26              | 16.2                  |
| ZG4       | 18.8                                | 3.23                                                 | 1.29              | 18.8                  |

**Table.S3 Raman and EDX analysis for GO and ZnO/rGO nanocomposite.**

| Catalysts | Raman                          | EDX      |           |           |
|-----------|--------------------------------|----------|-----------|-----------|
|           | I <sub>D</sub> /I <sub>G</sub> | C (wt %) | C/O ratio | C/H ratio |
| GO        | 1.464                          | 41.96    | 0.811     | 15.66     |
| ZG1       | 1.545                          | 54.83    | 1.307     | 23.69     |
| ZG2       | 1.608                          | 61.39    | 1.715     | 30.73     |
| ZG3       | 1.659                          | 63.52    | 1.853     | 36.13     |
| ZG4       | 1.660                          | 65.32    | 2.006     | 39.43     |

**Table.S4 Kinetic rate constant (k), regression coefficient (R<sup>2</sup>) and percentage degradation of dimethoate**

| Catalysts | k (10 <sup>-3</sup> min <sup>-1</sup> ) | R <sup>2</sup> | Degradation of dimethoate (%) |
|-----------|-----------------------------------------|----------------|-------------------------------|
| None      | 0.7                                     | 0.9969         | 11.6                          |
| ZG0       | 6.2                                     | 0.9953         | 66.3                          |
| ZG1       | 16.9                                    | 0.9901         | 95.3                          |
| ZG2       | 24.4                                    | 0.98           | 98.2                          |
| ZG3       | 15.9                                    | 0.9861         | 95.4                          |
| ZG4       | 5.5                                     | 0.9765         | 66.9                          |

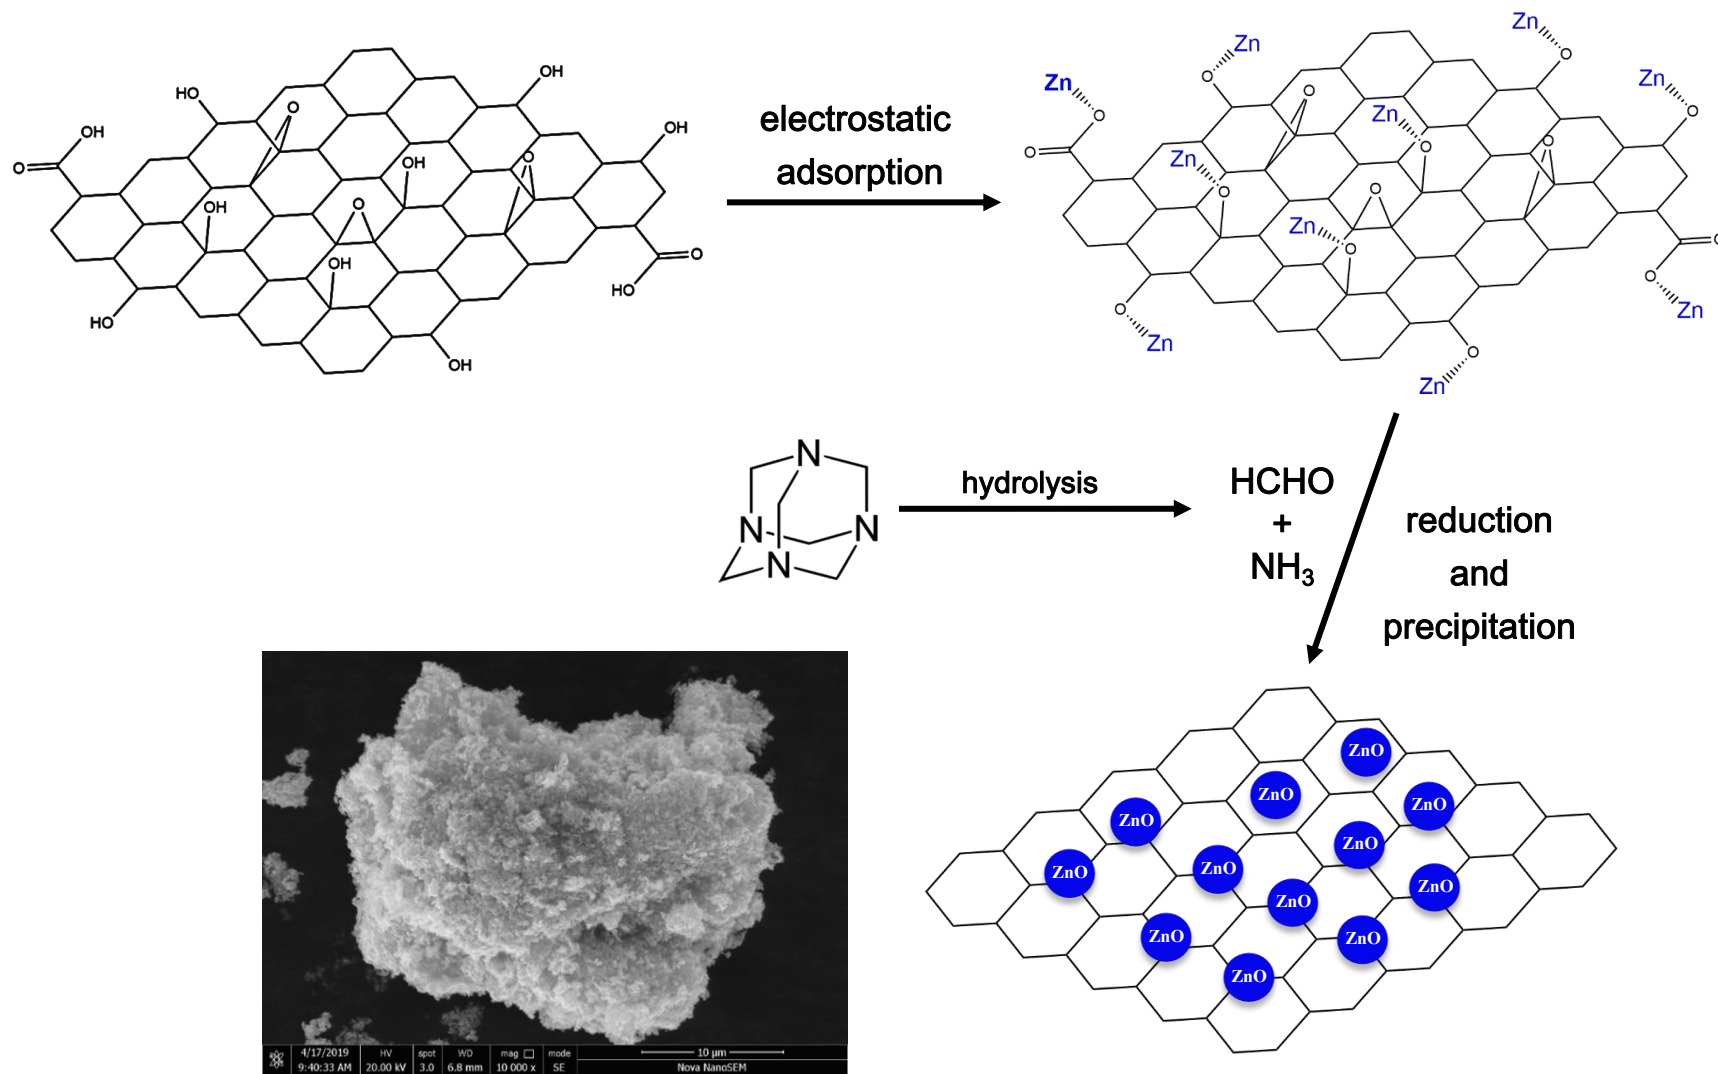

Fig. S1. Formation of ZnO/rGO composites

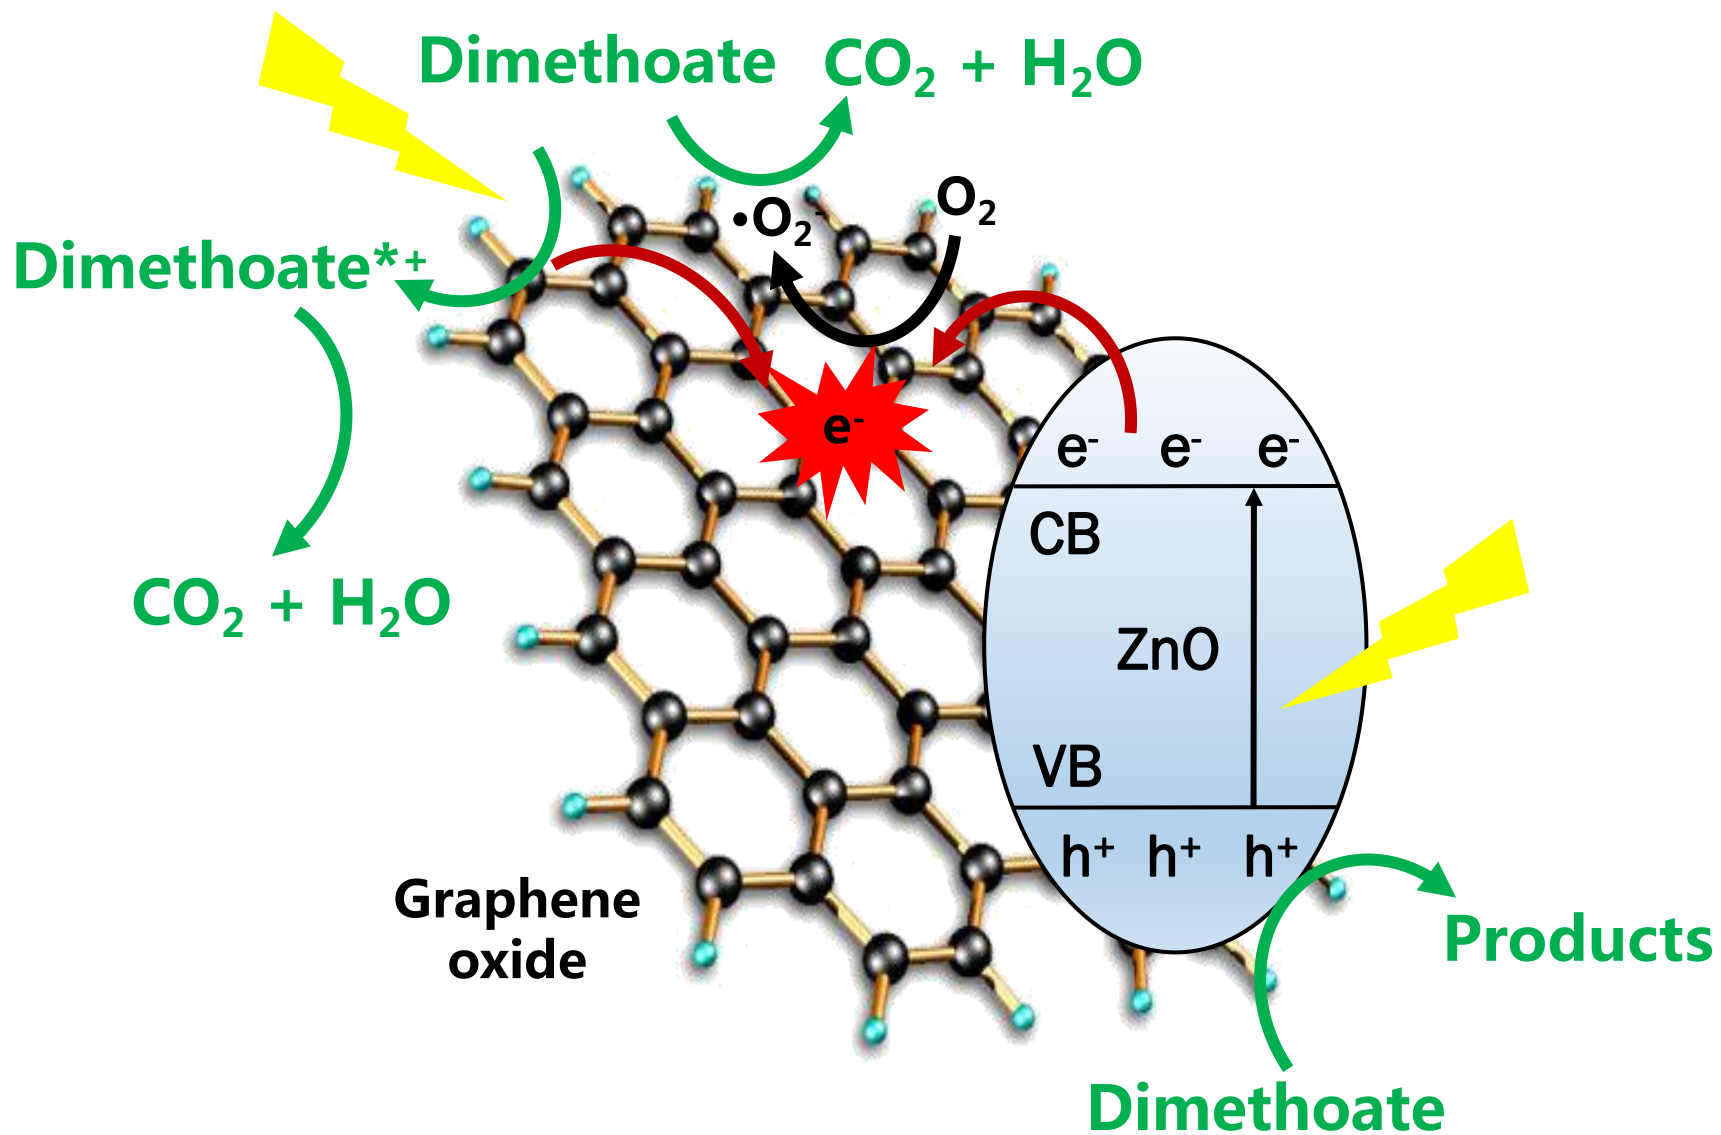

Fig. S2. Scheme of proposed mechanism for photocatalytic degradation of dimethoate on ZnO/rGO catalyst

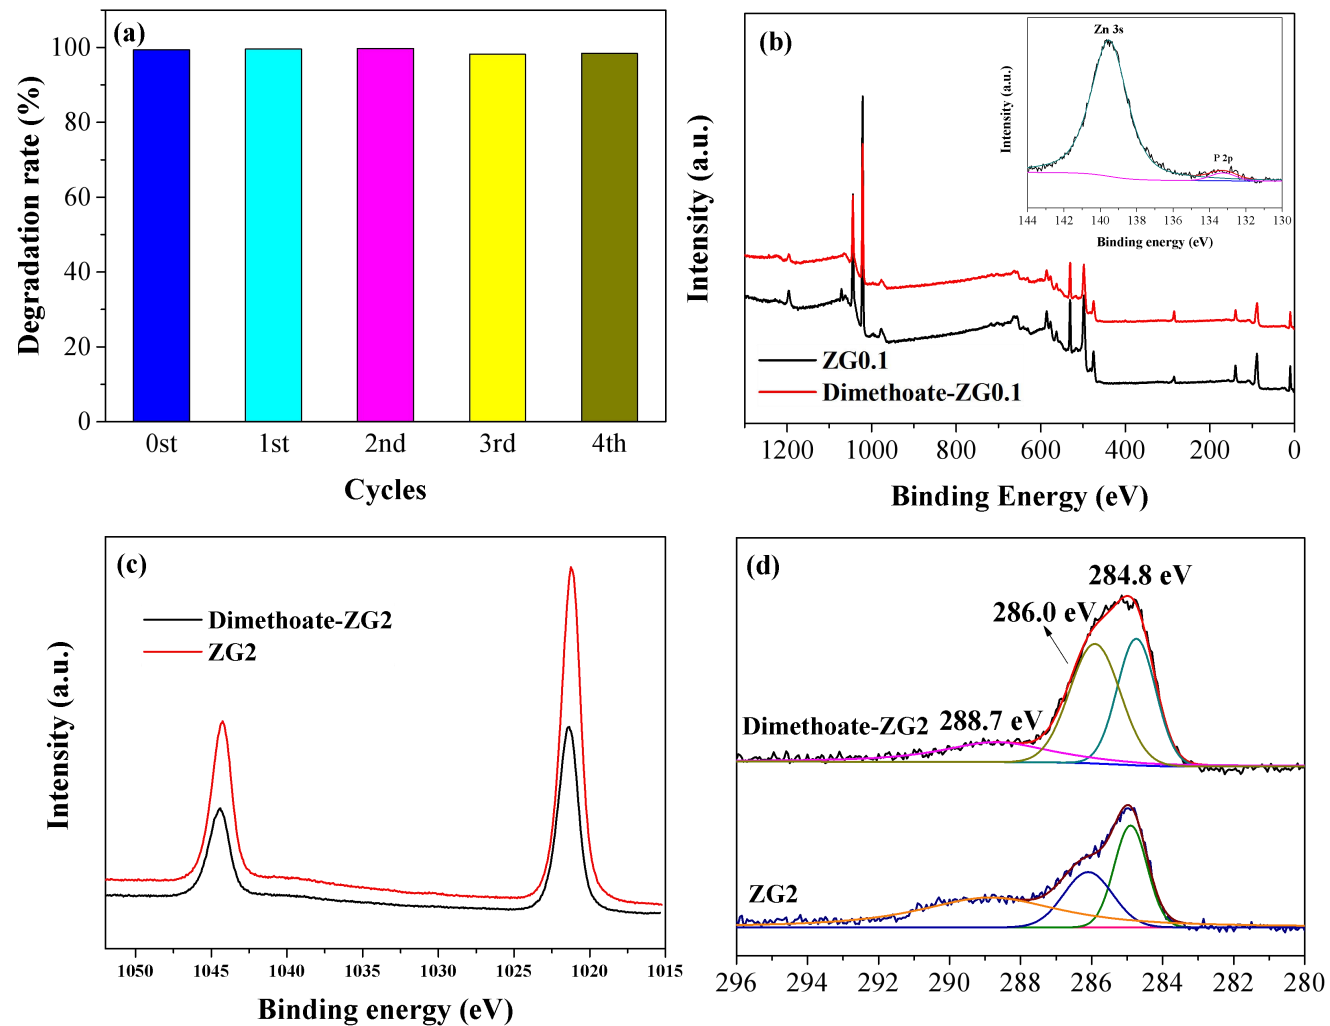

**Fig. S3 (a) Reusability of ZG2 for the degradation of dimethoate. (b) XPS total survey spectra. (c) Zn 2p and (d) C 1s high-resolution XPS data of ZG2 and dimethoate-ZG2.**
